# Supplementary material for: Comparative mitochondrial genomics of snakes: extraordinary substitution rate dynamics and functionality of the duplicate control region
Source: PubMed Central journal article supplement (PMC1950710; doi:10.1186/1471-2148-7-123), 2007-07-26

## **Additional File 3 (Supplementary Figure)**

### **Supplementary Figure S1 - Comparison of mitochondrial gene lengths among snakes and other tetrapod groups.**

The total length (b.p.) is shown for all protein coding regions (A), tRNAs (B), and rRNAs (C). All snakes are in gray, while other squamates (lizards) are in black; light gray and dark gray bars are drawn under snakes species to indicate membership in the Colubroidea or Acro-Heno Clade, respectively.

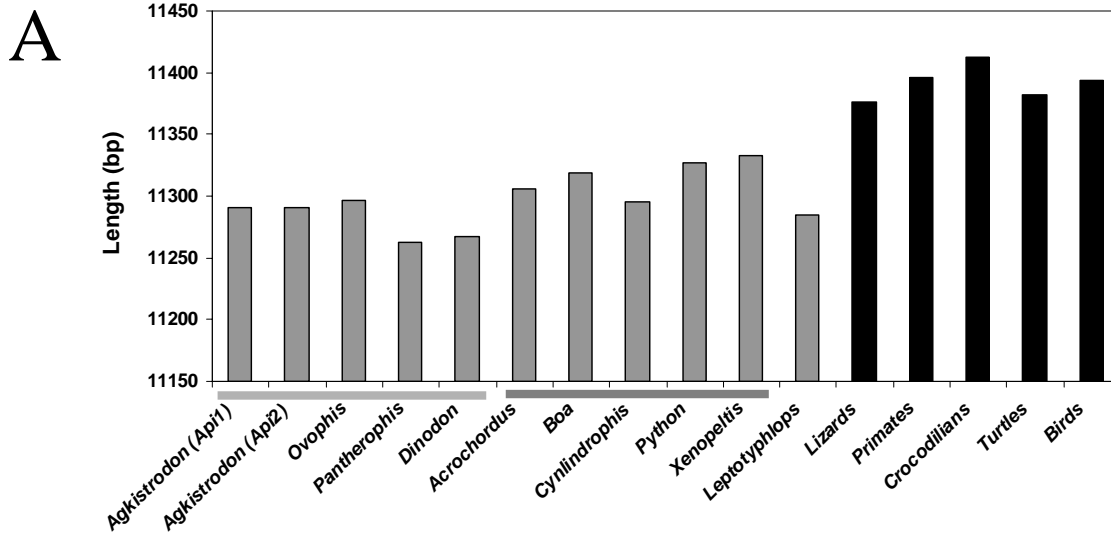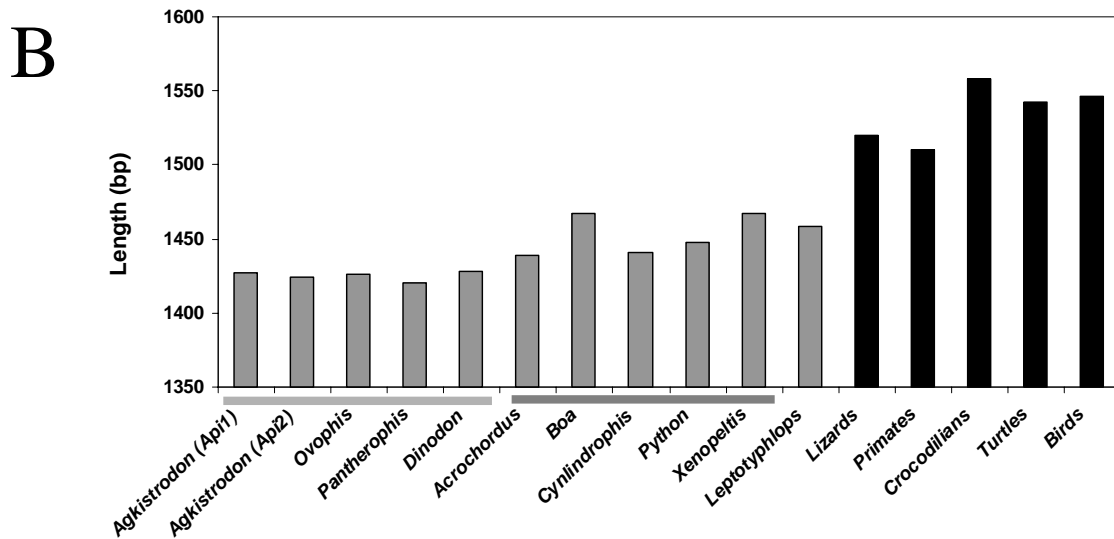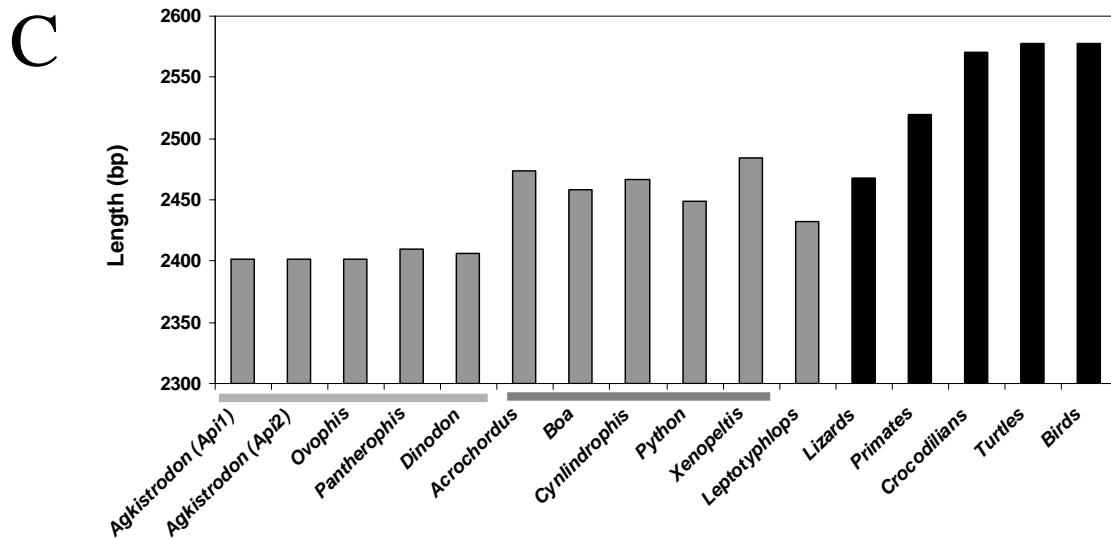

Supplement: 1471-2148-7-123-S3.pdf [file 1471-2148-7-123-S3.pdf]
